# Supplementary material for: Estimated Intake of Potassium, Phosphorus and Zinc with the Daily Diet Negatively Correlates with ADP-Dependent Whole Blood Platelet Aggregation in Older Subjects
Source: MDPI journal article supplement (doi:10.3390/nu16030332), 2024-01-23
Supplement: s1 [file s1]

**Table S1.** Medical history and medical treatment variables reported in the studied group.

| Variable                                     | Both sexes (n = 246) | Males (n = 124)     | Females (n = 122)                      |
|----------------------------------------------|----------------------|---------------------|----------------------------------------|
| <i>Medical indices</i>                       |                      |                     |                                        |
| Age [years]                                  | 62.4 ± 1.7           | 62.9 ± 1.7          | 62.6 ± 1.6 <sup>T*</sup>               |
| Current smoking [%]                          | 23.4                 | 23.4                | 21.3 <sup>F, n.s.</sup>                |
| BMI [kg/m <sup>2</sup> ]                     | 27.3 (24.7 – 30.3)   | 27.5 (25.06 – 30.4) | 27.2 (24.4 – 30.04) <sup>U, n.s.</sup> |
| WHR                                          | 0.92 (0.84 – 1.00)   | 0.99 (0.94 – 1.04)  | 0.84 (0.80 – 0.91) <sup>U, ††</sup>    |
| Hypertension [%]                             | 46.1                 | 53.2                | 39.3 <sup>F, *</sup>                   |
| Hypercholesterolaemia [%]                    | 62.7                 | 58.8                | 67.2 <sup>F, n.s.</sup>                |
| Type 2 diabetes mellitus [%]                 | 9.3                  | 11.3                | 7.4 <sup>F, n.s.</sup>                 |
| Myocardial infarction in the past [%]        | 1.6                  | 2.4                 | 0.8 <sup>F, n.s.</sup>                 |
| Stroke in the past [%]                       | 2.8                  | 4.0                 | 1.6 <sup>F, n.s.</sup>                 |
| Osteoporosis [%]                             | 11.3                 | 2.4                 | 20.5 <sup>F, ††</sup>                  |
| Diseases of stomach and duodenum [%]         | 32.4                 | 27.4                | 37.7 <sup>F, *</sup>                   |
| Cancer in the past [%]                       | 6.8                  | 5.6                 | 8.2 <sup>F, n.s.</sup>                 |
| Ophtalmologic diseases [%]                   | 20.2                 | 20.1                | 20.5 <sup>F, n.s.</sup>                |
| Depression [%]                               | 14.9                 | 9.7                 | 20.5 <sup>F, #</sup>                   |
| Chronic obstructive pulmonary disease [%]    | 12.1                 | 10.5                | 13.9 <sup>F, n.s.</sup>                |
| Joints diseases [%]                          | 48.2                 | 44.3                | 52.5 <sup>F, n.s.</sup>                |
| <i>Medicines taken currently</i>             |                      |                     |                                        |
| Blocker of histamine receptor H2 [%]         | 0.0                  | 0.0                 | 0.0 <sup>F, n.s.</sup>                 |
| Acetylsalicylic acid [%]                     | 0.0                  | 0.0                 | 0.0 <sup>F, n.s.</sup>                 |
| Clopidogrel or ticlopidine                   | 0.0                  | 0.0                 | 0.0 <sup>F, n.s.</sup>                 |
| Acenonocoumarol [%]                          | 0.0                  | 0.0                 | 0.0 <sup>F, n.s.</sup>                 |
| Nitrates [%]                                 | 0.4                  | 0.8                 | 0.0 <sup>F, n.s.</sup>                 |
| Beta blockers [%]                            | 19.5                 | 19.3                | 19.7 <sup>F, n.s.</sup>                |
| Digoxin [%]                                  | 0.0                  | 0.8                 | 0.0 <sup>F, n.s.</sup>                 |
| Angiotensin converting enzyme inhibitors [%] | 18.2                 | 18.5                | 18.8 <sup>F, n.s.</sup>                |
| Calcium channel blockers [%]                 | 10.6                 | 13.7                | 7.4 <sup>F, *</sup>                    |
| Indapamide [%]                               | 10.5                 | 12.1                | 9.0 <sup>F, n.s.</sup>                 |
| Spironolactone [%]                           | 0.8                  | 0.8                 | 0.8 <sup>F, n.s.</sup>                 |

|                                           |      |      |                         |
|-------------------------------------------|------|------|-------------------------|
| Sartans [%]                               | 5.7  | 4.0  | 6.5 <sup>F, n.s.</sup>  |
| Thiazide [%]                              | 3.2  | 1.6  | 4.1 <sup>F, n.s.</sup>  |
| Amiloride [%]                             | 0.4  | 0.0  | 0.8 <sup>F, n.s.</sup>  |
| Torsemide [%]                             | 0.4  | 0.8  | 0.8 <sup>F, n.s.</sup>  |
| Eplerenone [%]                            | 0.0  | 0.8  | 0.0 <sup>F, n.s.</sup>  |
| Alpha blockers [%]                        | 5.7  | 11.3 | 0.0 <sup>F, ††</sup>    |
| Statins [%]                               | 17.0 | 19.3 | 14.7 <sup>F, n.s.</sup> |
| Fibrates [%]                              | 2.4  | 0.8  | 4.0 <sup>F, *</sup>     |
| Bisphosphonates [%]                       | 2.4  | 0.0  | 4.9 <sup>F, #</sup>     |
| Allopurinol [%]                           | 2.4  | 4.0  | 1.6 <sup>F, n.s.</sup>  |
| Insulin [%]                               | 2.4  | 4.8  | 0.0 <sup>F, #</sup>     |
| Metformin [%]                             | 6.5  | 6.5  | 6.6 <sup>F, n.s.</sup>  |
| Gliclazide/glimepiride [%]                | 3.7  | 5.6  | 1.6 <sup>F, *</sup>     |
| Steroids [%]                              | 1.6  | 0.0  | 3.3 <sup>F, *</sup>     |
| Methotrexate [%]                          | 1.2  | 0.8  | 1.6 <sup>F, n.s.</sup>  |
| Non-steroidal anti-inflammatory drugs [%] | 2.0  | 2.4  | 1.6 <sup>F, n.s.</sup>  |
| Beta mimetics [%]                         | 3.2  | 2.4  | 4.1 <sup>F, n.s.</sup>  |
| Antihistamines [%]                        | 1.6  | 0.0  | 3.2 <sup>F, *</sup>     |
| Antidepressants [%]                       | 3.2  | 1.6  | 4.9 <sup>F, n.s.</sup>  |
| Neuroleptics [%]                          | 0.8  | 0.8  | 0.8 <sup>F, n.s.</sup>  |
| Vinpocetine/nootropics [%]                | 3.7  | 4.0  | 3.3 <sup>F, n.s.</sup>  |
| Trimetazidine [%]                         | 0.8  | 0.8  | 0.8 <sup>F, n.s.</sup>  |
| Mesalazine [%]                            | 0.4  | 0.0  | 0.8 <sup>F, n.s.</sup>  |
| Trimebutine [%]                           | 0.8  | 0.8  | 0.8 <sup>F, n.s.</sup>  |
| Diosmin [%]                               | 2.4  | 0.0  | 4.9 <sup>F, #</sup>     |
| Levodopa [%]                              | 0.4  | 0.8  | 0.0 <sup>F, n.s.</sup>  |

Continuous variables presented as means  $\pm$  SD, medians with interquartile ranges (from lower [25%] to upper [75%] quartile). Categorical variables (not adjusted) presented as percentage fractions of a whole group of investigated patients.

Comparisons between men and women performed with the use of unpaired Student *t* test (<sup>T</sup>), Mann–Whitney *U* test (<sup>U</sup>) or (<sup>F</sup>) Fisher's exact test. \**P* ≤ 0.05, #*P* < 0.01, ††*P* < 0.0001, <sup>n.s.</sup>*P* > 0.05..

*Abbreviations used:* BMI. body mass index; WHR, waist-hip ratio.

**Table S2.** Canonical correlations between the set of concentrations of diet minerals and blood platelet aggregation in older men and women

| <i>platelet aggregation<br/>(dependent variable)</i> | <i>total<br/>redundance<br/>[%]</i> | <i>explanatory variables (set 2)</i> | <i>extracted<br/>variance [%]</i> | <i>total<br/>redundance<br/>[%]</i> | <i>canonical<br/>correlation</i> | <i>canonical<br/>determination<br/>[R<sup>2</sup>]</i> | <i>P</i> | <i>Wilks'<br/>lambda</i> | <i>best<br/>contributors<br/>expl var</i> |
|------------------------------------------------------|-------------------------------------|--------------------------------------|-----------------------------------|-------------------------------------|----------------------------------|--------------------------------------------------------|----------|--------------------------|-------------------------------------------|
| <b>set I</b>                                         |                                     |                                      |                                   |                                     |                                  |                                                        |          |                          |                                           |
| <i>AA-dependent</i>                                  | 6.859%                              | <i>microelements</i>                 | 26.179%                           | 1.844%                              | 0.257                            | 0.066                                                  | 0.150    | 0.931                    | Zn, K, P                                  |
| <i>collagen--dependent</i>                           | 8.779%                              | <i>microelements</i>                 | 22.351%                           | 1.952%                              | 0.290                            | 0.084                                                  | 0.072    | 0.912                    | Zn, P, K, Mg,<br>Fe                       |
| <i>ADP-dependent</i>                                 | 10.662%                             | <i>microelements</i>                 | 20.690%                           | 2.226%                              | 0.323                            | 0.104                                                  | 0.020    | 0.893                    | Zn, K, P, Fe                              |
| <b>set II</b>                                        |                                     |                                      |                                   |                                     |                                  |                                                        |          |                          |                                           |
| <i>AA-dependent</i>                                  | 6.895%                              | <i>microelements</i>                 | 26.132%                           | 1.842%                              | 0.257                            | 0.066                                                  | 0.149    | 0.931                    | Zn, K, P                                  |
| <i>collagen--dependent</i>                           | 8.836%                              | <i>microelements</i>                 | 22.180%                           | 1.944%                              | 0.291                            | 0.085                                                  | 0.069    | 0.912                    | Zn, P, K, Mg,<br>Fe                       |
| <i>ADP-dependent</i>                                 | 10.712%                             | <i>microelements</i>                 | 20.615%                           | 2.223%                              | 0.324                            | 0.105                                                  | 0.018    | 0.893                    | Zn, K, P, Fe                              |
| <b>set III</b>                                       |                                     |                                      |                                   |                                     |                                  |                                                        |          |                          |                                           |
| <i>AA-dependent</i>                                  | 6.857%                              | <i>microelements</i>                 | 26.091%                           | 1.825%                              | 0.257                            | 0.066                                                  | 0.147    | 0.931                    | Zn, K, P                                  |
| <i>collagen--dependent</i>                           | 8.837%                              | <i>microelements</i>                 | 22.164%                           | 1.946%                              | 0.291                            | 0.084                                                  | 0.074    | 0.912                    | Zn, P, K, Mg,<br>Fe                       |
| <i>ADP-dependent</i>                                 | 10.717%                             | <i>microelements</i>                 | 20.653%                           | 2.229%                              | 0.323                            | 0.104                                                  | 0.021    | 0.893                    | Zn, K, P, Fe                              |

R<sup>2</sup> is a squared canonical correlation coefficient (canonical determination), which is relevant to overall variance between canonical variables. Total redundancy is relevant to the variance between the canonical variable for set 2 (minerals of the study) and the variable describing whole blood platelet response to the agonization with AA, collagen or ADP; it shows the representation of a given canonical variable by the explanatory variables of the set 2. Extracted variance is a variance between a given canonical variable and the variables that build it up; it reflects how well a given canonical variable represents a given set of variables. The Wilks' lambda is the parameter reflecting the contribution of a set 2 to the explaining of the variance of a set 1; the lower is the Wilks' lambda,

the higher is the contribution. Canonical correlation was calculated with the use of the bootstrap-boosted procedure of resampling with replacement (10000 iterations). The following microelements were included in the set 2 (microelements): sodium (Na), potassium (K), calcium (Ca), phosphorus (P), magnesium (Mg), iron (Fe), zinc (Zn), copper (Cu) and manganese (Mn).
